# Supplementary material for: Robust SARS-CoV-2 Antibody Responses in Asian COVID-Naïve Subjects 180 Days after Two Doses of BNT162b2 mRNA COVID-19 Vaccine
Source: MDPI journal article supplement (doi:10.3390/vaccines9111241), 2021-10-25
Supplement: s1 [file s1]

**Supplementary Table S1: STARD checklist**

| Section & Topic          | No         | Item                                                                                                                                                   | Reported on page #    |
|--------------------------|------------|--------------------------------------------------------------------------------------------------------------------------------------------------------|-----------------------|
| <b>TITLE OR ABSTRACT</b> |            |                                                                                                                                                        |                       |
|                          | <b>1</b>   | Identification as a study of diagnostic accuracy using at least one measure of accuracy (such as sensitivity, specificity, predictive values, or AUC)  | <b>2</b>              |
| <b>ABSTRACT</b>          |            |                                                                                                                                                        |                       |
|                          | <b>2</b>   | Structured summary of study design, methods, results, and conclusions (for specific guidance, see STARD for Abstracts)                                 | <b>2</b>              |
| <b>INTRODUCTION</b>      |            |                                                                                                                                                        |                       |
|                          | <b>3</b>   | Scientific and clinical background, including the intended use and clinical role of the index test                                                     | <b>4</b>              |
|                          | <b>4</b>   | Study objectives and hypotheses                                                                                                                        | <b>5</b>              |
| <b>METHODS</b>           |            |                                                                                                                                                        |                       |
| <i>Study design</i>      | <b>5</b>   | Whether data collection was planned before the index test and reference standard were performed (prospective study) or after (retrospective study)     | <b>6</b>              |
| <i>Participants</i>      | <b>6</b>   | Eligibility criteria                                                                                                                                   | <b>6</b>              |
|                          | <b>7</b>   | On what basis potentially eligible participants were identified (such as symptoms, results from previous tests, inclusion in registry)                 | <b>6</b>              |
|                          | <b>8</b>   | Where and when potentially eligible participants were identified (setting, location and dates)                                                         | <b>6</b>              |
|                          | <b>9</b>   | Whether participants formed a consecutive, random or convenience series                                                                                | <b>6</b>              |
| <i>Test methods</i>      | <b>10a</b> | Index test, in sufficient detail to allow replication                                                                                                  | <b>6</b>              |
|                          | <b>10b</b> | Reference standard, in sufficient detail to allow replication                                                                                          | <b>7</b>              |
|                          | <b>11</b>  | Rationale for choosing the reference standard (if alternatives exist)                                                                                  | <b>7</b>              |
|                          | <b>12a</b> | Definition of and rationale for test positivity cut-offs or result categories of the index test, distinguishing pre-specified from exploratory         | <b>7</b>              |
|                          | <b>12b</b> | Definition of and rationale for test positivity cut-offs or result categories of the reference standard, distinguishing pre-specified from exploratory | <b>7</b>              |
|                          | <b>13a</b> | Whether clinical information and reference standard results were available to the performers/readers of the index test                                 | <b>7</b>              |
|                          | <b>13b</b> | Whether clinical information and index test results were available to the assessors of the reference standard                                          | <b>7</b>              |
| <i>Analysis</i>          | <b>14</b>  | Methods for estimating or comparing measures of diagnostic accuracy                                                                                    | <b>8</b>              |
|                          | <b>15</b>  | How indeterminate index test or reference standard results were handled                                                                                | <b>8</b>              |
|                          | <b>16</b>  | How missing data on the index test and reference standard were handled                                                                                 | <b>8</b>              |
|                          | <b>17</b>  | Any analyses of variability in diagnostic accuracy, distinguishing pre-specified from exploratory                                                      | <b>8</b>              |
|                          | <b>18</b>  | Intended sample size and how it was determined                                                                                                         | <b>Not applicable</b> |
| <b>RESULTS</b>           |            |                                                                                                                                                        |                       |
| <i>Participants</i>      | <b>19</b>  | Flow of participants, using a diagram                                                                                                                  | <b>Not applicable</b> |
|                          | <b>20</b>  | Baseline demographic and clinical characteristics of participants                                                                                      | <b>6</b>              |
|                          | <b>21a</b> | Distribution of severity of disease in those with the target condition                                                                                 | <b>Not applicable</b> |
|                          | <b>21b</b> | Distribution of alternative diagnoses in those without the target condition                                                                            | <b>Not applicable</b> |
|                          | <b>22</b>  | Time interval and any clinical interventions between index test and reference standard                                                                 | <b>Not applicable</b> |
| <i>Test results</i>      | <b>23</b>  | Cross tabulation of the index test results (or their distribution) by the results of the reference standard                                            | <b>9</b>              |
|                          | <b>24</b>  | Estimates of diagnostic accuracy and their precision (such as 95% confidence intervals)                                                                | <b>Not applicable</b> |

|                   |    |                                                                                                       |                |
|-------------------|----|-------------------------------------------------------------------------------------------------------|----------------|
|                   | 25 | Any adverse events from performing the index test or the reference standard                           | Not applicable |
| DISCUSSION        |    |                                                                                                       |                |
|                   | 26 | Study limitations, including sources of potential bias, statistical uncertainty, and generalisability | 17             |
|                   | 27 | Implications for practice, including the intended use and clinical role of the index test             | 16             |
| OTHER INFORMATION |    |                                                                                                       |                |
|                   | 28 | Registration number and name of registry                                                              | 8              |
|                   | 29 | Where the full study protocol can be accessed                                                         | Not applicable |
|                   | 30 | Sources of funding and other support; role of funders                                                 | Not applicable |

**Supplementary Table S2:** IgM values at various time points after first and second vaccination.

| Time point             | n  | Median (COI) | Range       |
|------------------------|----|--------------|-------------|
| Pre-vaccination        | 70 | 0.030000     | 0.01 – 0.77 |
| 10 days post-dose 1    | 71 | 0.36000      | 0.02 – 5.33 |
| 20-40 days post-dose 1 | 8  | 0.55857      | 0.11 – 7.55 |
| 20 days post-dose 2    | 67 | 2.26000      | 0.13 – 13.6 |
| 40 days post-dose 2    | 48 | 1.34996      | 0.09 – 15.8 |
| 60 days post-dose 2    | 49 | 0.86000      | 0.07 – 2.96 |
| 90 days post-dose 2    | 37 | 0.41000      | 0.07 – 1.99 |
| 120 days post-dose 2   | 8  | 0.10954      | 0.04 – 1.92 |
| 150 days post-dose 2   | 18 | 0.15969      | 0.02 – 1.05 |
| 180 days post-dose 2   | 8  | 0.13416      | 0.03 – 0.83 |

**Supplementary Table S3:** Antibody comparison of titres >90 days post-second vaccination between subjects <50 and ≥50 years old

|                      | 120 days         | 150 days         | 180 days         | All              |
|----------------------|------------------|------------------|------------------|------------------|
| N <50/≥50            | 4/4              | 9/9              | 5/3              | 18/16            |
| <b>T-Ab (BAU/mL)</b> |                  |                  |                  |                  |
| <50 Median, Range    | 1999 (1587-2852) | 1327 (415-2852)  | 664 (180-2936)   | 1415 (180-2936)  |
| ≥50 Median, Range    | 1129 (370-2125)  | 765 (357-1803)   | 1294 (344-1594)  | 814 (344-2125)   |
| Median difference, p | 1091, p = 0.20   | 463, p = 0.11    | 164, p = 0.79    | 414, p = 0.10    |
| <b>IgG (BAU/mL)</b>  |                  |                  |                  |                  |
| <50 Median, Range    | 454 (440-669)    | 307 (75-445)     | 217 (88-2452)    | 355 (75-2452)    |
| ≥50 Median, Range    | 377 (105-733)    | 179 (75-450)     | 310 (80-314)     | 210 (75-733)     |
| Median difference, p | 177, p = 0.89    | 118, p = 0.14    | 115, p = 0.79    | 123, p = 0.09    |
| <b>IgM (COI)</b>     |                  |                  |                  |                  |
| <50 Median, Range    | 0.83 (0.08-1.92) | 0.28 (0.06-0.66) | 0.18 (0.04-0.31) | 0.22 (0.04-1.92) |
| ≥50 Median, Range    | 0.11 (0.04-1.25) | 0.12 (0.02-1.05) | 0.10 (0.03-0.83) | 0.12 (0.02-1.25) |
| Median difference, p | 0.19, p = 0.25   | 0.06, p = 0.31   | 0.01, p = 1.00   | 0.05, p = 0.22   |
| <b>N-Ab (ug/mL)</b>  |                  |                  |                  |                  |
| <50 Median, Range    | 2.53 (1.93-2.82) | 1.70 (0.43-2.82) | 1.13 (0.66-1.53) | 1.67 (0.43-2.82) |
| ≥50 Median, Range    | 0.61 (0.58-2.46) | 1.06 (0.39-2.36) | 1.73 (0.39-1.92) | 1.06 (0.39-2.46) |
| Median difference, p | 1.57, p = 0.23   | 0.64, p = 0.09   | 0.55, p = 0.57   | 0.47, p = 0.06   |

**Supplementary Table S4:** Comparison of all antibody titres >90 days post-second vaccination between male and female subjects

|                      |                 |
|----------------------|-----------------|
| <b>N Male/Female</b> | 9/25            |
| <b>T-Ab (BAU/mL)</b> |                 |
| Male Median, Range   | 762, 344-2851   |
| Female Median, Range | 1269, 180-2936  |
| Median difference, p | 84, p = 0.80    |
| <b>IgG (BAU/mL)</b>  |                 |
| Male Median, Range   | 246, 80-445     |
| Female Median, Range | 307, 75-2452    |
| Median difference, p | 61, p = 0.49    |
| <b>IgM (COI)</b>     |                 |
| Male Median, Range   | 0.08, 0.02-1.25 |
| Female Median, Range | 0.17, 0.03-1.92 |
| Median difference, p | 0.03, p = 0.62  |
| <b>N-Ab (ug/mL)</b>  |                 |
| Male Median, Range   | 1.31, 0.39-2.82 |
| Female Median, Range | 1.51, 0.39-2.67 |
| Median difference, p | 0.06, p = 0.82  |
